# Supplementary material
Source: PubMed Central journal article supplement (PMC8257816)
Supplement: 12250_2020_248_MOESM1_ESM.pdf [file 12250_2020_248_MOESM1_ESM.pdf]

## Electronic Supplementary Material

### Human H9N2 Avian Influenza Infection: Epidemiological and Clinical Characterization of 16 Cases in China

Xuan Dong<sup>1#</sup> · Jiasong Xiong<sup>2,3#</sup> · Chaolin Huang<sup>1</sup> · Jie Xiang<sup>1</sup> · Wenjuan Wu<sup>1</sup> · Nanshan Chen<sup>1</sup> · Danning Wen<sup>1</sup> · Chao Tu<sup>1</sup> · Xueli Qiao<sup>1</sup> · Liang Kang<sup>1</sup> · Zhongzi Yao<sup>2,3</sup> · Dingyu Zhang<sup>1✉</sup> · Quanjiao Chen<sup>1,2✉</sup>

1. Wuhan JinYinTan Hospital, Wuhan 430023, China.

2. CAS Key Laboratory of Special Pathogens and Biosafety, Wuhan Institute of Virology, Joint Laboratory of Infectious Diseases and Health, Wuhan Institute of Virology & Wuhan Jinyintan Hospital, Center for Biosafety Mega-Science, CAS Center for Influenza Research and Early Warning, Chinese Academy of Sciences, Wuhan 430071, China.

3. University of Chinese Academy of Sciences, Beijing 100049, China.

Supporting information to DOI: 10.1007/s12250-020-00248-9

#### Supplementary materials

#### METHODS

##### Patients and data collection

Inpatients that presented with influenza-like illness at Wuhan JinYinTan Hospital in Wuhan (China) between January and February 2019 were included in this study. The history of hospitalization and physical examination, hematological, biochemical, radiological, and microbiological test results were collected.

##### Samples and data collection

Oropharyngeal swabs from patients with influenza-like illness were detected by rRT-PCR and colloidal gold kits, and fifty-four swabs with influenza A-positive were subjected to next-generation sequencing (NGS) at the end of April 2019. In total, 16 H9N2 complete genomes were obtained. After laboratory confirmation, we retrospectively studied epidemiological, clinical, and virological characteristics of the patients. Seven patients were tracked and 13 serum samples were collected from these patients and their family members.

##### Laboratory tests

Oropharyngeal swabs collected on admission were analyzed for the presence of influenza A/B viruses and other respiratory viruses using real-time reverse-transcription (rRT)-PCR assay kits (Z-RR-0097-02; Shanghai Zhijiang Biotechnology) and colloidal gold kits (SD Bioline Influenza Ag; Standard Diagnostics). Complete genome sequences of influenza A virus in samples were obtained by NGS. AIV H9N2 human infections were confirmed by RT-PCR with H9-specific primers (Bi *et al.* 2016), virus isolation, and hemagglutination inhibition (HI) assays.

##### Virus isolation and HI assay

Oropharyngeal swabs were inoculated into specific pathogen-free chicken embryos to isolate the virus. The H9N2 isolates were confirmed by hemagglutination assay and RT-PCR. HI assays were conducted using chicken erythrocytes according to WHO guidelines, with modifications reported by Gregory *et al.* (Huang *et al.* 2013; Kayali *et al.* 2008; World Health Organization. 2011).

### **Statistical analysis**

The independence test between the clinical characteristics and severe/mild cases and death in severe cases were done by using Fisher's exact test. All analyses were performed using SPSS software for Windows (version 17.0).

Definitions of human H9N2 infection, sepsis, acute respiratory distress syndrome (ARDS), and severe influenza

### **Section 1. Human H9N2 case definitions**

The case definitions of confirmed human infection with H9N2 AIVs were based on the H5N1 case definitions, according to World Health Organization (WHO) in 2006 (World Health Organization. 2006). In this study, the oropharyngeal swabs from influenza-like illness (ILI) patients which were influenza A nucleic acid or antigen positive were sequenced by next generation sequencing (NGS). The whole genome of Avian influenza H9N2 virus were found in the oropharyngeal swabs of patients, subsequently, human cases with H9N2 avian influenza infection were confirmed by RT-PCR with H9 specific primers, virus isolation, and convalescent patients' sera (tested by haemagglutination inhibition assays) (World Health Organization. 2011)

### **Section 2. Definitions of sepsis (Singer *et al.* 2016)**

The sepsis was diagnosed based on definitions in Sepsis 3.0. The patients have at least 2 of the following clinical features of quickSOFA (qSOFA): respiratory rate of 22/min or greater, altered mentation, or systolic blood pressure of 100 mm Hg or less.

### **Section 3. Definitions of acute respiratory distress syndrome (ARDS) (Force *et al.* 2012)**

ARDS was diagnosed according to ARDS Berlin definitions, namely:

- (1). Timing: within 1 week of a known clinical insult or new or worsening respiratory symptoms
- (2). Chest imaging: bilateral opacities—not fully explained by effusions, lobar/lung collapse, or nodules
- (3). Origin of edema: respiratory failure not fully explained by cardiac failure or fluid overload need objective assessment (eg, echocardiography) to exclude hydrostatic edema if no risk factor present
- (4). Oxygenation: Mild:  $200 \text{ mm Hg} < \text{PaO}_2/\text{FIO}_2 \leq 300 \text{ mm Hg}$  with  $\text{PEEP or CPAP} \geq 5 \text{ cm H}_2\text{O}$  Moderate:  $100 \text{ mm Hg} < \text{PaO}_2/\text{FIO}_2 \leq 200 \text{ mm Hg}$  with  $\text{PEEP} \geq 5 \text{ cm H}_2\text{O}$  Severe:  $\text{PaO}_2/\text{FIO}_2 \leq 100 \text{ mm Hg}$  with  $\text{PEEP} \geq 5 \text{ cm H}_2\text{O}$

### **Section 4. Definitions of severe influenza case**

The severe influenza case was diagnosed according to Management For Diagnosis and Treatment of Influenza revised edition (2018) in China (National Health Commission of the People's Republic of China. 2018), one of following situations occurs:

- (1). Persistent fever > three days, associated with intense and rapid coughs, purulent sputum, hemoptysis and chest pain
- (2). Increasing respiratory rate, dyspnea, cyanosis
- (3). Altered mental status: slow reaction, drowsiness, restlessness, convulsions
- (4). Severe vomit, diarrhea, dehydration

- (5). Complicated pneumonia
- (6). Deterioration of comorbid disease

## References

- Bi Y *et al.* (2016) Genesis, Evolution and Prevalence of H5N6 Avian Influenza Viruses in China *Cell Host Microbe* 20:810-821 doi:10.1016/j.chom.2016.10.022
- Huang R *et al.* (2013) Seroprevalence of avian influenza H9N2 among poultry workers in Shandong Province, China *Eur J Clin Microbiol Infect Dis* 32:1347-1351
- Kayali G, Setterquist SF, Capuano AW, Myers KP, Gill JS, Gray GC (2008) Testing human sera for antibodies against avian influenza viruses: horse RBC hemagglutination inhibition vs. microneutralization assays *J Clin Virol* 43:73-78
- World Health Organization. (2011) Manual for the laboratory diagnosis and virological surveillance of influenza. 2011. Available at: [https://apps.who.int/iris/bitstream/handle/10665/44518/9789241548090\\_eng.pdf](https://apps.who.int/iris/bitstream/handle/10665/44518/9789241548090_eng.pdf). Accessed 1 Jan 2020
- World Health Organization. (2006) WHO case definitions for human infections with influenza A(H5N1) virus. 29 August 2006. Available at: [https://www.who.int/influenza/resources/documents/case\\_definition2006\\_08\\_29/en/](https://www.who.int/influenza/resources/documents/case_definition2006_08_29/en/). Accessed 1 Jan 2020
- Singer M *et al.* (2016) The Third International Consensus Definitions for Sepsis and Septic Shock (Sepsis-3) *JAMA* 315:801-810
- Force ADT *et al.* (2012) Acute respiratory distress syndrome: the Berlin Definition *JAMA* 307:2526-2533
- National Health Commission of the People's Republic of China (2019) Protocol for diagnosis and treatment of influenza (2018 revised version). *Chin J Clin Infect Dis* 2019;12:1-5.

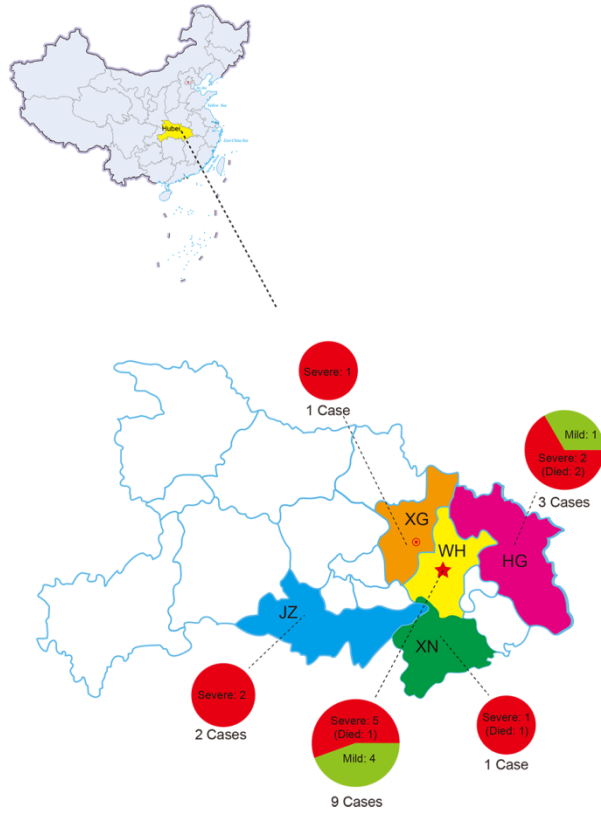

**Fig. S1.** Geographic distribution of 16 confirmed H9N2 cases in Hubei Province, China in 2019. Human cases of infection with H9N2 avian influenza virus distributed in five cities: Jingzhou (JZ, cyan); Xiaogan (XG, orange); Wuhan (WH, yellow); Huanggang (HG, magenta); Xianning (XN, green).

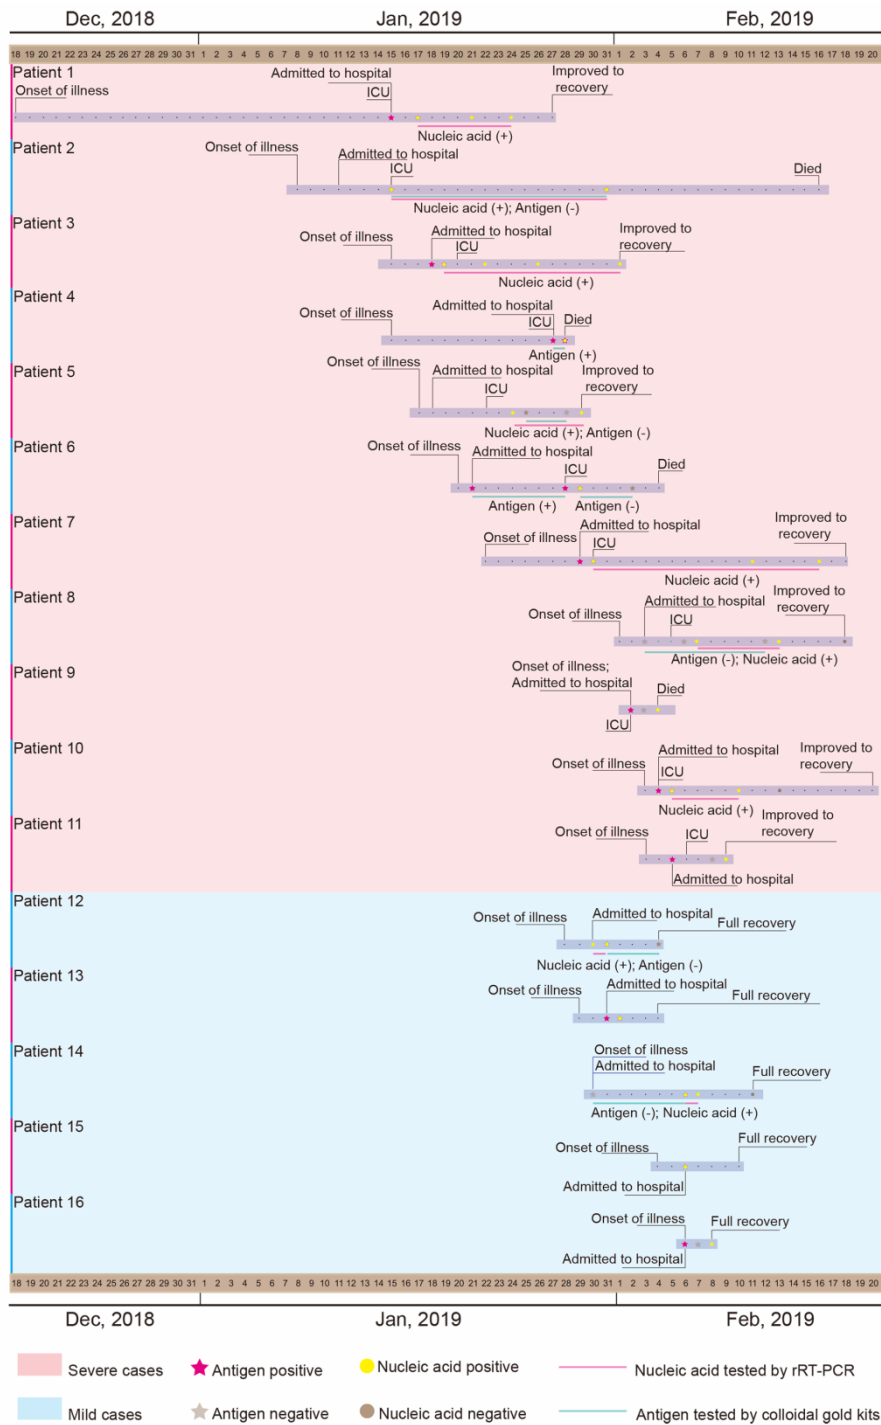

**Fig. S2.** Timeline of the disease course of the 16 patients studied. In total, 16 patients were included in this study, including 11 severe cases (patients 1 to 11, pink background, upper part) and 5 mild cases (patients 12 to 16, blue background, lower part). Abbreviation: ICU, intensive care unit.

**Table S1.** Patients, related to Figure S1.

| Patient    | Sex    | Age (years) | Severity of illness | Location  | Outcome              |
|------------|--------|-------------|---------------------|-----------|----------------------|
| Patient 1  | Male   | 61          | Severe              | Xiaogan   | Improved to recovery |
| Patient 2  | Male   | 46          | Severe              | Huanggang | Died                 |
| Patient 3  | Female | 62          | Severe              | Wuhan     | Improved to recovery |
| Patient 4  | Male   | 48          | Severe              | Huanggang | Died                 |
| Patient 5  | Female | 75          | Severe              | Wuhan     | Improved to recovery |
| Patient 6  | Male   | 88          | Severe              | Wuhan     | Died                 |
| Patient 7  | Male   | 62          | Severe              | Jingzhou  | Improved to recovery |
| Patient 8  | Male   | 62          | Severe              | Wuhan     | Improved to recovery |
| Patient 9  | Male   | 55          | Severe              | Xianning  | Died                 |
| Patient 10 | Female | 60          | Severe              | Jingzhou  | Improved to recovery |
| Patient 11 | Male   | 82          | Severe              | Wuhan     | Improved to recovery |
| Patient 12 | Female | 68          | Mild                | Wuhan     | Full recovery        |
| Patient 13 | Male   | 68          | Mild                | Wuhan     | Full recovery        |
| Patient 14 | Female | 1.1         | Mild                | Wuhan     | Full recovery        |
| Patient 15 | Male   | 2.1         | Mild                | Huanggang | Full recovery        |
| Patient 16 | Female | 48          | Mild                | Wuhan     | Full recovery        |

Note: The median age of these 16 patients was 61.5 years.

**Table S2.** Haemagglutination inhibition (HI) antibody titres against avian influenza virus H9N2\*.

| Sera <sup>†</sup> | HI titres (anti-H9N2 AIV) <sup>§</sup> |
|-------------------|----------------------------------------|
| Patient 1         | 40                                     |
| Patient 7         | 80                                     |
| Patient 8         | 160                                    |
| Patient 10        | 80                                     |
| Patient 13        | 160                                    |
| Patient 16        | 160                                    |

|              |     |
|--------------|-----|
| Patient 1-W  | 160 |
| Patient 4-W  | 80  |
| Patient 4-S  | 40  |
| Patient 7-W  | 80  |
| Patient 8-W  | 80  |
| Patient 13-W | 80  |
| Patient 16-H | 80  |

\*A total of 13 sera were collected from six patients and seven family members, about five months after they discharged from hospital. Avian influenza virus H9N2: A/chicken/Hunan/06.22 YYGK2T3/2018(H9N2).

†W: patient's wife; S: patient's son; H: patient's husband.

§ Serum samples were considered positive if titers  $\geq 1:80$ , and all results were from at least 2 independent assays.

**Table S3.** Clinical features, laboratory results, and treatment of five mild cases.

| Characteristic                         | Value       |
|----------------------------------------|-------------|
| Age (years)                            |             |
| Median (range)                         | 48 (1.1–68) |
| Subgroup — no. (%)                     |             |
| 0–4                                    | 2 (40)      |
| 5–14                                   | 0           |
| 15–49                                  | 1 (20)      |
| 50–64                                  | 0           |
| $\geq 65$                              | 2 (40)      |
| Male — no. (%)                         | 2 (40)      |
| Transferred to ICU* — no. (%)          | 0           |
| Underlying health conditions — no. (%) | 0           |
| Onset symptom — no. (%)                |             |
| Fever                                  | 5 (100)     |
| Cough, expectoration, chest distress   | 2 (40)      |

|                                             |         |
|---------------------------------------------|---------|
| Diarrhea or vomit                           | 1 (20)  |
| Selected Laboratory abnormalities — no. (%) |         |
| Increased WBC <sup>†</sup>                  | 1 (20)  |
| Neutrophilia                                | 3 (60)  |
| Lymphopenia                                 | 3 (60)  |
| Chest radiologic findings — no. (%)         |         |
| Normal                                      | 1 (20)  |
| Increased bronchovascular shadows           | 4 (80)  |
| Clouding opacity                            | 4 (80)  |
| Treatment — no. (%)                         |         |
| Antiviral treatment (oseltamivir)           | 5 (100) |
| Oxygen therapy (nasal catheter)             | 2 (40)  |
| Antibiotic treatment                        | 4 (80)  |
| Clinical outcome — no. (%)                  |         |
| Full recovery                               | 5 (100) |

---

\*ICU: intensive care unit.

<sup>†</sup>WBC: white blood cell count.



**Table S4.** Clinical characteristics, infection indicators, treatment, and clinical outcomes of 5 mild cases.

| Characteristic                             | Patient 12                                      | Patient 13 | Patient 14 | Patient 15      | Patient 16                                               |
|--------------------------------------------|-------------------------------------------------|------------|------------|-----------------|----------------------------------------------------------|
| Age (years)                                | 68                                              | 68         | 1.1        | 2.1             | 48                                                       |
| Sex                                        | Female                                          | Male       | Female     | Male            | Female                                                   |
| Occupation                                 | Retired                                         | Retired    | Infant     | Infant          | Self-employed                                            |
| Comorbid conditions                        | No                                              | No         | No         | No              | No                                                       |
| Onset of symptom                           | Fever, cough, expectoration, and chest distress | Fever      | Fever      | Fever and vomit | Fever, cough, expectoration, chest distress, and dyspnea |
| Date of illness onset                      | 2019.01.28                                      | 2019.01.29 | 2019.01.30 | 2019.02.04      | 2019.02.06                                               |
| Date of admission                          | 2019.01.30                                      | 2019.01.31 | 2019.02.06 | 2019.02.05      | 2019.02.06                                               |
| Transferred to ICU*                        | No                                              | No         | No         | No              | No                                                       |
| Date of specimen collected to be sequenced | 2019.01.31                                      | 2019.02.01 | 2019.02.07 | 2019.02.06      | 2019.02.08                                               |
| Spesis                                     | No                                              | No         | No         | No              | No                                                       |
| ARDS <sup>†</sup>                          | No                                              | No         | No         | No              | No                                                       |
| WBC <sup>§</sup> ( $\times 10^9/L$ )       | 5.8                                             | 6.18       | 13.79      | 8.78            | 5.74                                                     |
| L (%) <sup>§</sup>                         | 9.4                                             | 7.5        | 52.2       | 15.9            | 7.3                                                      |
| N (%) <sup>§</sup>                         | 81                                              | 85.8       | 31         | 70.1            | 90.3                                                     |
| PCT (ng/ml) <sup>§</sup>                   | 0.1                                             | <0.05      | <0.05      | NA              | <0.05                                                    |

|                                                       |                |               |               |               |                |
|-------------------------------------------------------|----------------|---------------|---------------|---------------|----------------|
| Sputum culture of G+/G-<br>‡                          | (-)            | (-)           | (-)           | (-)           | NA             |
| Oxygen therapy                                        | Nasal catheter | No            | No            | No            | Nasal catheter |
| Antiviral agent                                       | Oseltamivir    | Oseltamivir   | Oseltamivir   | Oseltamivir   | Oseltamivir    |
| Interval of illness onset to antiviral therapy (days) | 2              | 2             | 7             | 2             | 1              |
| Duration of antiviral therapy (days)                  | 5              | 4             | 5             | 4             | 2              |
| Stay in hospital (days)                               | 5              | 5             | 5             | 4             | 1              |
| Outcome                                               | Full recovery  | Full recovery | Full recovery | Full recovery | Full recovery  |

Note: (-) indicates negative; NA: not applicable.

\*ICU: intensive care unit.

†ARDS: acute respiratory distress syndrome.

§ WBC: white blood cells count; L (%): percent of lymphocyte; N (%): percent of neutrophile granulocyte; PCT (ng/ml): procalcitonin.

‡Sputum culture of G+/G-: culture and identify Gram-positive/Gram-negative bacteria in sputum.

**Table S5.** Clinical features, laboratory results, and treatment of 11 severe cases.

| Characteristic | Value      |
|----------------|------------|
| Age (years)    |            |
| Median (range) | 62 (46–88) |

|                                               |          |
|-----------------------------------------------|----------|
| Subgroup — no. (%)                            |          |
| 0–4                                           | 0        |
| 5–14                                          | 0        |
| 15–49                                         | 2 (18.2) |
| 50–64                                         | 6 (54.5) |
| ≥65                                           | 3 (27.3) |
| Male — no. (%)                                | 8 (72.7) |
| Transferred to ICU* — no. (%)                 | 11 (100) |
| Underlying health conditions — no. (%)        | 9 (81.8) |
| Cardiovascular diseases                       | 5 (45.5) |
| Respiratory diseases                          | 2 (18.2) |
| Endocrine system diseases                     | 2 (18.2) |
| Central nervous system diseases               | 1 (9.1)  |
| Digestive system diseases                     | 2 (18.2) |
| Urinary system diseases                       | 1 (9.1)  |
| Onset symptom — no. (%)                       |          |
| Fever                                         | 9 (81.8) |
| Cough, expectoration, chest distress, dyspnea | 11 (100) |
| Bloody sputum                                 | 2 (18.2) |
| Muscle ache                                   | 1 (9.1)  |
| Selected laboratory abnormalities — no. (%)   |          |

|                                                         |           |
|---------------------------------------------------------|-----------|
| Sepsis                                                  | 10 (90.9) |
| ARDS <sup>†</sup>                                       | 7 (63.6)  |
| Neutrophilia                                            | 11 (100)  |
| Lymphopenia                                             | 11 (100)  |
| Increased procalcitonin                                 | 9 (81.8)  |
| Bacteria or fungus isolation from culture               | 3 (27.3)  |
| Bacteria                                                | 2 (18.2)  |
| Fungus                                                  | 3 (27.3)  |
| Chest radiologic findings — no. (%)                     |           |
| Involved bilaterally                                    | 11 (100)  |
| Increased bronchovascular shadows                       | 11 (100)  |
| Clouding opacity                                        | 11 (100)  |
| Widely distributed flocculent, and ground-glass opacity | 3 (27.3)  |
| Treatment — no. (%)                                     |           |
| Antiviral treatment (oseltamivir)                       | 11 (100)  |
| Oxygen therapy                                          |           |
| Mechanical ventilation                                  | 3 (27.3)  |
| Mask                                                    | 2 (18.2)  |
| Nasal catheter                                          | 3 (27.3)  |
| High flow oxygen                                        | 3 (27.3)  |
| Antibiotic treatment                                    |           |

|                                      |          |
|--------------------------------------|----------|
| Combined use of multiple antibiotics | 11 (100) |
| Antifungal therapy                   | 3 (27.3) |
| Glucocorticoid therapy               | 2 (18.2) |
| Intravenous immune globulin therapy  | 3 (27.3) |
| Clinical outcome — no. (%)           |          |
| Deceased                             | 4 (36.4) |
| Improved to recovery                 | 7 (63.6) |

\*ICU: intensive care unit

†ARDS: acute respiratory distress syndrome

**Table S6.** Clinical characteristics, infection indicators, treatment, and clinical outcomes of 11 severe cases.

| Characteristic      | Patient 1                                         | Patient 2      | Patient 3                             | Patient 4         | Patient 5                                                                                      | Patient 6 | Patient 7    | Patient 8    | Patient 9                   | Patient 10              | Patient 11                  |
|---------------------|---------------------------------------------------|----------------|---------------------------------------|-------------------|------------------------------------------------------------------------------------------------|-----------|--------------|--------------|-----------------------------|-------------------------|-----------------------------|
| Age (years)         | 61                                                | 46             | 62                                    | 48                | 75                                                                                             | 88        | 62           | 62           | 55                          | 60                      | 82                          |
| Sex                 | Male                                              | Male           | Female                                | Male              | Female                                                                                         | Male      | Male         | Male         | Male                        | Female                  | Male                        |
| Occupation          | Retired                                           | Self- employed | Retired                               | Self-<br>employed | Retired                                                                                        | Retired   | Retired      | Retired      | Self- employed              | Peasant                 | Retired                     |
| Comorbid conditions | Cerebral infarction; benign prostatic hyperplasia | No             | Chronic obstructive pulmonary disease | Gastric ulcer     | Hypertension; diabetes; hypothyroidism ; tricuspid valve replacement and tricuspid valvoplasty | No        | Hypertension | Hypertension | Hyperlipidemia ; uarthritis | Hypertension ; diabetes | Gastric ulcer; tuberculosis |

| Onset of symptom                           | Cough; expectoration; chest stress; dyspnea; bloody sputum | Fever; cough; expectoration; chest stress; dyspnea | Fever; cough; expectoration ; chest stress; dyspnea; bloody sputum | Fever; cough; expectoration ; chest stress; dyspnea | Fever; cough; expectoration; chest stress; dyspnea; muscle ache | Fever; cough; expectoration ; chest stress; dyspnea | Cough; expectoration ; chest stress; dyspnea |
|--------------------------------------------|------------------------------------------------------------|----------------------------------------------------|--------------------------------------------------------------------|-----------------------------------------------------|-----------------------------------------------------------------|-----------------------------------------------------|-----------------------------------------------------|-----------------------------------------------------|-----------------------------------------------------|-----------------------------------------------------|----------------------------------------------|
| Date of illness onset                      | 2018.12.18                                                 | 2019.01.08                                         | 2019.01.15                                                         | 2019.01.15                                          | 2019.01.17                                                      | 2019.01.20                                          | 2019.01.22                                          | 2019.02.01                                          | 2019.02.02                                          | 2019.02.02                                          | 2019.02.03                                   |
| Date of admission                          | 2019.01.15                                                 | 2019.01.15                                         | 2019.01.18                                                         | 2019.01.27                                          | 2019.01.17                                                      | 2019.01.28                                          | 2019.01.29                                          | 2019.02.05                                          | 2019.02.02                                          | 2019.02.04                                          | 2019.02.05                                   |
| Transferred to ICU*                        | 2019.01.15                                                 | 2019.01.15                                         | 2019.01.20                                                         | 2019.01.27                                          | 2019.01.24                                                      | 2019.01.28                                          | 2019.01.30                                          | 2019.02.05                                          | 2019.02.02                                          | 2019.02.04                                          | 2019.02.06                                   |
| Date of specimen collected to be sequenced | 2019.01.17                                                 | 2019.01.15                                         | 2019.01.19                                                         | 2019.01.28                                          | 2019.01.25                                                      | 2019.01.29                                          | 2019.01.30                                          | 2019.02.07                                          | 2019.02.04                                          | 2019.02.05                                          | 2019.02.09                                   |
| Sepsis                                     | No                                                         | Yes                                                | Yes                                                                | Yes                                                 | Yes                                                             | Yes                                                 | Yes                                                 | Yes                                                 | Yes                                                 | Yes                                                 | Yes                                          |
| ARDS <sup>†</sup>                          | No                                                         | Yes                                                | Yes                                                                | Yes                                                 | No                                                              | No                                                  | Yes                                                 | Yes                                                 | Yes                                                 | Yes                                                 | No                                           |
| Acute Renal Injury                         | No                                                         | Yes                                                | No                                                                 | Yes                                                 | No                                                              | Yes                                                 | No                                                  | No                                                  | No                                                  | No                                                  | No                                           |
| Secondary infections                       | No                                                         | Yes                                                | No                                                                 | No                                                  | No                                                              | No                                                  | No                                                  | No                                                  | No                                                  | No                                                  | No                                           |
| Interval of illness onset to ARDS (days)   | NA                                                         | 7                                                  | 5                                                                  | 12                                                  | NA                                                              | NA                                                  | 8                                                   | 4                                                   | 1                                                   | 1                                                   | NA                                           |
| Interval of illness onset to sepsis (days) | NA                                                         | 7                                                  | 5                                                                  | 12                                                  | 7                                                               | 8                                                   | 8                                                   | 4                                                   | 1                                                   | 1                                                   | 2                                            |
| WBC <sup>§</sup> (×10 <sup>9</sup> /L)     | 6.21                                                       | 8.92                                               | 10.39                                                              | 9.7                                                 | 7.96                                                            | 9.72                                                | 6.94                                                | 8.32                                                | 7.96                                                | 4.56                                                | 5.63                                         |
| L (%) <sup>§</sup>                         | 11.9                                                       | 5.6                                                | 5.6                                                                | 11.4                                                | 7.6                                                             | 5.8                                                 | 15.9                                                | 5                                                   | 7.6                                                 | 8.5                                                 | 5.8                                          |
| N (%) <sup>§</sup>                         | 80.7                                                       | 93.5                                               | 90.2                                                               | 83.4                                                | 79.2                                                            | 91.6                                                | 80.4                                                | 92.3                                                | 79.2                                                | 88.2                                                | 87.7                                         |
| PT (s) <sup>§</sup>                        | 17                                                         | 10.2                                               | 11.3                                                               | 14.5                                                | 42.6                                                            | 28.1                                                | 12.1                                                | 11                                                  | 11.3                                                | 13.2                                                | 11.5                                         |
| APTT (s) <sup>§</sup>                      | 46.5                                                       | 32.1                                               | 43.3                                                               | 33.1                                                | 60                                                              | 54.3                                                | 49.6                                                | 37.6                                                | 34                                                  | 41.9                                                | 34.9                                         |

|                                                       |                         |                                                |                                                        |                        |             |                |                  |                        |                  |                         |                |
|-------------------------------------------------------|-------------------------|------------------------------------------------|--------------------------------------------------------|------------------------|-------------|----------------|------------------|------------------------|------------------|-------------------------|----------------|
| PT-fbg (g/L) <sup>§</sup>                             | 4.295                   | 4.589                                          | 2.531                                                  | 5.135                  | 5.974       | 3.371          | 5.219            | 4.547                  | 4.421            | 2.615                   | 3.287          |
| PCT (ng/ml) <sup>§</sup>                              | 0.08                    | 0.11                                           | 1.7                                                    | 3.74                   | <0.05       | 3.31           | 1                | 0.76                   | 0.08             | 1.95                    | <0.05          |
| Sputum culture of G+/G- <sup>‡</sup>                  | (-)                     | <i>Stenotrophomonas maltophilia</i>            | <i>Pseudomonas aeruginosa; Acinetobacter baumannii</i> | (-)                    | (-)         | (-)            | (-)              | (-)                    | (-)              | (-)                     | (-)            |
| Sputum culture of Fungal                              | <i>Candida albicans</i> | <i>Aspergillus fumigatus; Candida albicans</i> | NA                                                     | NA                     | (-)         | NA             | (-)              | (-)                    | (-)              | <i>Candida albicans</i> | (-)            |
| Blood culture                                         | NA                      | <i>E.casseliflavus; S.xylosus</i>              | NA                                                     | NA                     | NA          | (-)            | NA               | (-)                    | (-)              | (-)                     | (-)            |
| Antiviral agent                                       | Oseltamivir             | Oseltamivir                                    | Oseltamivir                                            | Oseltamivir            | Oseltamivir | Oseltamivir    | Oseltamivir      | Oseltamivir            | Oseltamivir      | Oseltamivir             | Oseltamivir    |
| Interval of illness onset to antiviral therapy (days) | 28                      | 7                                              | 3                                                      | 2                      | 1           | 1              | 7                | 4                      | 1                | 1                       | 2              |
| Duration of antiviral therapy (days)                  | 12                      | 18                                             | 13                                                     | 2                      | 6           | 9              | 14               | 13                     | 2                | 13                      | 4              |
| Oxygen therapy                                        | Nasal catheter          | High flow oxygen                               | Mechanical ventilation                                 | Mechanical ventilation | Mask        | Nasal catheter | High flow oxygen | Mechanical ventilation | High flow oxygen | Mask                    | Nasal catheter |
| Antibiotic therapy                                    | Yes                     | Yes                                            | Yes                                                    | Yes                    | Yes         | Yes            | Yes              | Yes                    | Yes              | Yes                     | Yes            |
| Antifungal therapy                                    | No                      | Yes                                            | No                                                     | No                     | No          | No             | No               | Yes                    | No               | Yes                     | No             |
| Glucocorticoid therapy                                | No                      | No                                             | No                                                     | No                     | No          | No             | Yes              | No                     | Yes              | No                      | No             |
| Intravenous immune globulin therapy                   | No                      | Yes                                            | No                                                     | No                     | Yes         | No             | No               | No                     | No               | Yes                     | No             |
| Length of stay in hospital (days)                     | 12                      | 32                                             | 14                                                     | 5                      | 5           | 5              | 21               | 12                     | 2                | 17                      | 4              |

|               |                      |            |                      |            |                      |            |                      |                      |            |                      |                      |
|---------------|----------------------|------------|----------------------|------------|----------------------|------------|----------------------|----------------------|------------|----------------------|----------------------|
| Outcome       | Improved to recovery | Died       | Improved to recovery | Died       | Improved to recovery | Died       | Improved to recovery | Improved to recovery | Died       | Improved to recovery | Improved to recovery |
| Date of death | NA                   | 2019.02.16 | NA                   | 2019.01.28 | NA                   | 2019.02.04 | NA                   | NA                   | 2019.02.04 | NA                   | NA                   |

**Table S7.** Univariate analysis of risk factors for Human H9N2 severe cases with the mild cases as control.

| Variables                                                              | Mild (n=5) | Severe (n=11) | <i>P</i> value |
|------------------------------------------------------------------------|------------|---------------|----------------|
| Age ( $\geq 65$ years)                                                 | 2 (40.0)   | 3 (27.3)      | 1.000          |
| Sex (Male)                                                             | 2 (40.0)   | 8 (72.7)      | 0.299          |
| Underlying health condition                                            | 0          | 9 (81.8)      | 0.005          |
| dyspea                                                                 | 1 (20.0)   | 11 (100)      | 0.003          |
| chest stress                                                           | 2 (40.0)   | 11 (100)      | 0.018          |
| ARDS*                                                                  | 0          | 7 (63.6)      | 0.034          |
| Sepsis                                                                 | 0          | 10 (90.9)     | 0.001          |
| Interval of illness onset to antiviral therapy >3 days                 | 1 (20.0)   | 4 (36.4)      | 0.622          |
| Sputum culture of G+/G- <sup>†</sup>                                   | 0          | 2 (18.2)      | 0.542          |
| WBC <sup>§</sup> < $4.0 \times 10^9/L$ or WBC > $1.0 \times 10^{10}/L$ | 1 (20.0)   | 1 (9.1)       | 1.000          |

\*ARDS: acute respiratory distress syndrome



†Sputum culture of G+/G-: culture and identify Gram-positive/Gram-negative bacteria in sputum

§ WBC: white blood cell count

**Table S8.** Univariate analysis of predictor for death of H9N2 human severe cases with who had recovered from illness as control.

| <b>Variables</b>                                           | <b>Death<br/>(n=4)</b> | <b>Recovery<br/>(n=7)</b> | <b>P value</b> |
|------------------------------------------------------------|------------------------|---------------------------|----------------|
| Age (≥65 years)                                            | 1 (25.0)               | 2 (28.6)                  | 1.000          |
| Sex (Male)                                                 | 4 (100)                | 4 (57.1)                  | 0.236          |
| ARDS*                                                      | 3 (75.0)               | 4 (57.1)                  | 1.000          |
| Spesis                                                     | 4 (100)                | 6 (85.7)                  | 1.000          |
| Sputum culture of<br>G+/G-†                                | 1 (25.0)               | 1 (14.3)                  | 1.000          |
| Interval of illness<br>onset to antiviral therapy > 6 days | 1 (25.0)               | 2 (28.6)                  | 1.000          |
| Acute Renal Injury                                         | 3 (75.0)               | 0                         | 0.024          |
| Secondary<br>infections                                    | 1 (75.0)               | 0                         | 0.364          |
| Underlying health condition                                | 2 (50.0)               | 7 (100)                   | 0.109          |

\*ARDS: acute respiratory distress syndrome

†Sputum culture of G+/G-: culture and identify Gram-positive/Gram-negative bacteria in sputum
